# Supplementary material for: Genome Wide Association Study Uncovers the QTLome for Osmotic Adjustment and Related Drought Adaptive Traits in Durum Wheat
Source: MDPI journal article supplement (doi:10.3390/genes13020293), 2022-02-02
Supplement: s1 [file s1]

**Table S4.** List of Flowering Time (FT) QTLs.

| Flowering Time (FT) |          |      |               |             |       |        |        |
|---------------------|----------|------|---------------|-------------|-------|--------|--------|
| QTL                 | Marker   | Chr. | Position (cM) | Log P value | $R^2$ | Allele | Effect |
| <i>QFT.ubo-1A.1</i> | IWA3089  | 1A   | 142.1         | 4.34        | 5.39  | A/G    | 6.17   |
| <i>QFT.ubo-2A.1</i> | IWB62185 | 2A   | 24.7          | 5.85        | 7.65  | C/T    | -12.40 |
| <i>QFT.ubo-2A.2</i> | IWA2526  | 2A   | 46.6          | 5.30        | 6.81  | C/T    | -6.68  |
| <i>QFT.ubo-2A.3</i> | IWB26001 | 2A   | 198.7         | 5.01        | 6.38  | A/G    | 16.50  |
| <i>QFT.ubo-2B.1</i> | IWB32315 | 2B   | 5.9           | 4.06        | 4.98  | A/G    | -6.40  |
| <i>QFT.ubo-4A.1</i> | IWB13323 | 4A   | 23.7          | 5.39        | 6.94  | C/T    | -12.46 |
| <i>QFT.ubo-4A.2</i> | IWB43659 | 4A   | 107.1         | 4.10        | 5.03  | A/G    | -5.08  |
| <i>QFT.ubo-4A.3</i> | IWB42413 | 4A   | 168.5         | 4.02        | 4.91  | A/G    | 5.49   |
| <i>QFT.ubo-4B.1</i> | IWA2125  | 4B   | 15.5          | 3.10        | 3.60  | C/T    | -6.28  |
| <i>QFT.ubo-5A.1</i> | IWB35931 | 5A   | 43.8          | 3.27        | 3.85  | C/G    | -9.09  |
| <i>QFT.ubo-5A.2</i> | IWB12396 | 5A   | 68.2          | 4.70        | 5.91  | C/T    | 5.48   |
| <i>QFT.ubo-5A.3</i> | IWB14493 | 5A   | 95.6          | 3.04        | 3.52  | C/T    | 4.61   |
| <i>QFT.ubo-6A.1</i> | IWB53923 | 6A   | 49.5          | 5.05        | 6.44  | C/T    | -10.86 |
| <i>QFT.ubo-6B.1</i> | IWB14571 | 6B   | 71.9          | 5.36        | 6.90  | A/G    | -9.23  |
| <i>QFT.ubo-7B.1</i> | IWB371   | 7B   | 177.1         | 4.26        | 5.27  | A/G    | 6.36   |
